# Supplementary material
Source: PubMed Central journal article supplement (PMC7286080)
Supplement: NIHMS1591048-supplement-Supplemental_Publication_Material.pdf [file NIHMS1591048-supplement-Supplemental_Publication_Material.pdf]

Desmoplakin Cardiomyopathy, a Fibrotic and Inflammatory Form of Cardiomyopathy  
Distinct from Typical Dilated or Arrhythmogenic Right Ventricular Cardiomyopathy

**Supplemental Data**

(For publication as online data supplement)

### **Supplemental Methods for Definition of Ventricular Involvement Subgroups:**

1. Normal ventricular function: defined as normal left ventricle (LV) and right ventricle (RV) size and function (LV/RV ejection fraction (EF)  $\geq 50\%$  and  $45\%$  respectively, by TTE or MRI) and absence of late gadolinium enhancement (LGE) when available.
2. Left ventricular predominant: defined as LV EF  $< 50\%$  by TTE or MRI and LV EF  $< RV$  EF, or presence of LV LGE and no evidence of RV dysfunction or RV wall motion abnormalities (WMA) on MRI.
3. Right ventricular predominant: defined as RV EF  $\leq 45\%$  on MRI, plus RV EF  $< LV$  EF, or RV dilation on TTE or MRI using the ARVC task force criteria.

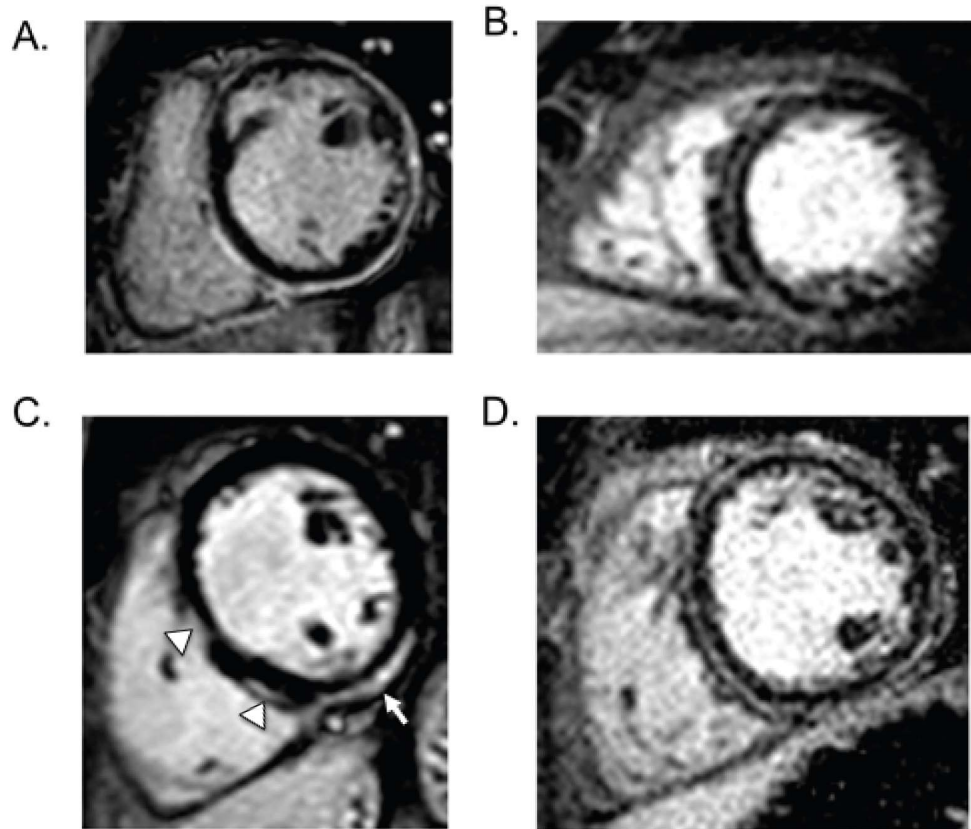

**Supplemental Figure 1. Myocardial Fibrosis Patterns in *DSP* Cardiomyopathy.**

Late gadolinium enhanced (LGE) cardiac magnetic resonance images in the short axis plane at the mid-ventricular level are shown for four representative cases. All blinded expert-reviewed cases (N=10) exhibited non-ischemic pattern of primarily subepicardial fibrosis at the mid-ventricular level. Circumferential fibrosis was present in 2 of 10 (A, D). Inferior (arrow, C) and inferoseptal (arrowheads, C) segments were involved in all cases. Septal LGE extended on the RV surface of the septum in 7 of 10 cases (e.g. A, C) and through the mid-myocardium of the septum in 3 of 10 cases (e.g. B, D). The left ventricular ejection fractions in the cases shown here were 34% (A), 47% (B), 48% (C), and 42% (D).

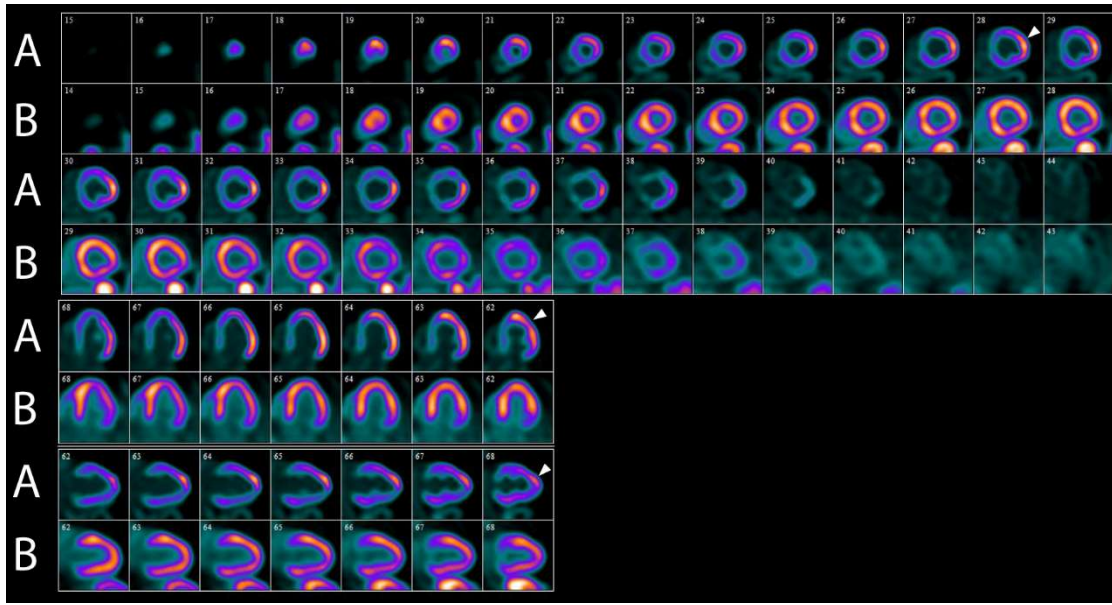

**Supplemental Figure 2. Acute Myocardial Inflammation in a *DSP* Cardiomyopathy Initially Diagnosed with Cardiac Sarcoidosis.** Images were obtained from a 56-year-old woman with a history of frequent premature ventricular contractions, non-ischemic cardiomyopathy, chest pain, and refractory ventricular tachycardia (VT). Due to refractory VT, evaluation with cardiac  $^{18}\text{F}$ -fluorodeoxyglucose positron emission tomography (FDG-PET) (A rows, long and short axis views) was obtained to evaluate for possible cardiac sarcoidosis. FDG-PET demonstrated areas of inflammation (arrow heads) detected by FDG uptake. Corollary views from rubidium PET perfusion imaging (B rows) reveals normal coronary perfusion. Based on the clinical presentation and FDG-PET evidence of acute inflammation, this patient was initially diagnosed with acute cardiac sarcoidosis and treated with prednisone, leflunomide, and methotrexate. Repeat FDG-PET after 1.5 years of immunosuppressive therapy demonstrated ongoing inflammation and anti-inflammatory therapy was minimized to low dose prednisone due to perceived lack of benefit. After the patient's nephew suddenly died at the age of 29 further evaluation for a familial cardiomyopathy was recommended and the patient was found to have a pathogenic nonsense mutation in DSP (c.1762C>T, p.Gln588\*). This patient also exhibited reduced LV systolic function with an LVEF of 34%.

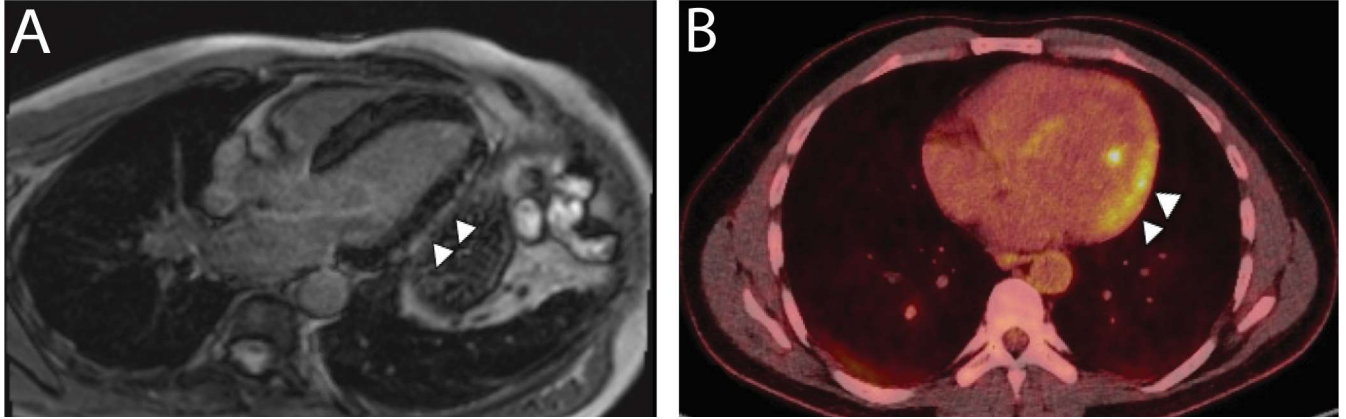

**Supplemental Figure 3: Myocardial inflammation in *DSP* cardiomyopathy corresponds to myocardial fibrosis**

Images were obtained from a 42 year old man with a *DSP* truncating mutation (c.5460\_5472del; p.Val1821Thrfs\*12) and ejection fraction of 45%. Cardiac magnetic resonance imaging (MRI) showed delayed enhancement in the septum and lateral wall (Panel A, indicated by arrows). <sup>18</sup>F-fluorodeoxyglucose positron emission tomography also revealed uptake in the septum and lateral wall in corresponding to areas of delayed enhancement on MRI (Panel B, indicated by arrows).

**Literature Reported Pathogenic Missense Variants**

| Nucleotide Location | cDNA Mutation Designation | Amino Acid Mutation Designation | Consequence | Protein Domain | Gnomad Total Allele Count | Gnomad Frequency | Total Cases | # out of 100 mammals that match | References                                                                                                                                             |
|---------------------|---------------------------|---------------------------------|-------------|----------------|---------------------------|------------------|-------------|---------------------------------|--------------------------------------------------------------------------------------------------------------------------------------------------------|
| 61                  | c.61G>A                   | p.Glu21Lys                      | Missense    | N-terminal     | 3                         | 1.36E-05         | 1           | 50/100                          | Castelletti 2017 <sup>1</sup>                                                                                                                          |
| 325                 | c.325G>A                  | p.Glu109Lys                     | Missense    | N-terminal     | 0                         | 0                | 1           | 90/100                          | Castelletti 2017 <sup>1</sup>                                                                                                                          |
| 593                 | c.593A>C                  | p.Gln198Pro                     | Missense    | N-terminal     | 0                         | 0                | 1           | 82/100                          | Ohno 2013 <sup>2</sup><br>Wada 2017 <sup>3</sup>                                                                                                       |
| 616                 | c.616G>A                  | p.Ala206Thr                     | Missense    | N-terminal     | 1                         | 4.06E-06         | 1           | 40/100                          | Sato 2015 <sup>4</sup>                                                                                                                                 |
| 621                 | c.621G>T                  | p.Trp207Cys                     | Missense    | N-terminal     | 0                         | 0                | 1           | 96/100                          | Bao 2013 <sup>5</sup>                                                                                                                                  |
| 868                 | c.868G>A                  | p.Glu290Lys                     | Missense    | N-Terminal     | 0                         | 0                | 1           | 99/100                          | Castelletti 2017 <sup>1</sup>                                                                                                                          |
| 897                 | c.897C>G                  | p.Ser299Arg                     | Missense    | N-terminal     | 0                         | 0                | 27*         | 85/100                          | Rampazzo 2002 <sup>6</sup><br>Bauce 2005 <sup>7</sup><br>Asimaki 2009 <sup>8</sup><br>Rigato 2013 <sup>9</sup>                                         |
| 1124                | c.1124A>T                 | Asn375Ile                       | Missense    | N-terminal     | 0                         | 0                | 1           | 91/100                          | Bauce 2011 <sup>10</sup><br>Rigato 2013 <sup>9</sup>                                                                                                   |
| 1203                | c.1203G>T                 | p.Leu401Asn                     | Missense    | N-terminal     | 0                         | 0                | 2           | 98/100                          | Ohno 2013 <sup>2</sup><br>Wada 2017 <sup>3</sup>                                                                                                       |
| 1264                | c.1264G>A                 | p.Glu422Lys                     | Missense    | N-terminal     | 0                         | 0                | 4*          | 100/100                         | Tan 2010 <sup>11</sup><br>te Riele 2013 <sup>12</sup><br>Bhonsale 2015 <sup>13</sup><br>Groeneweg 2015 <sup>14</sup>                                   |
| 1325                | c.1325C>T                 | p.Ser442Phe                     | Missense    | N-terminal     | 0                         | 0                | 2           | 98/100                          | Castelletti 2017 <sup>1</sup><br>Quarta 2011 <sup>15</sup>                                                                                             |
| 1333                | c.1333A>G                 | p.Ile445Val                     | Missense    | N-terminal     | 0                         | 0                | 5*          | 99/100                          | Sen-Chowdry 2008 <sup>16</sup><br>Den Haan 2009 <sup>17</sup><br>Tan 2010 <sup>11</sup><br>Bohnsale 2015 <sup>13</sup><br>Groeneweg 2015 <sup>14</sup> |
| 1372                | c.1372A>T                 | p.Asn458Tyr                     | Missense    | N-terminal     | 2                         | 7.96E-06         | 3           | 74/100                          | Bauce 2011 <sup>10</sup><br>Rigato 2013 <sup>9</sup>                                                                                                   |
| 1408                | c.1408A>G                 | p.Lys470Glu                     | Missense    | N-terminal     | 0                         | 0                | 2           | 100/100                         | Rigato 2013 <sup>9</sup>                                                                                                                               |
| 1493                | c.1493C>T                 | p.Pro498Leu                     | Missense    | N-terminal     | 4                         | 1.59E-05         | 5           | 99/100                          | Jan 2015 <sup>18</sup>                                                                                                                                 |
| 1520                | c.1520C>T                 | p.Ser507Phe                     | Missense    | N-terminal     | 0                         | 0                | 4           | 100/100                         | Sen Chowdry 2008 <sup>16</sup><br>Quarta 2011 <sup>15</sup><br>Castelletti 2017 <sup>1</sup>                                                           |
| 1544                | c.1544C>T                 | p.Pro515Leu                     | Missense    | N-terminal     | 0                         | 0                | 1           | 99/100                          | Gigli 2019 <sup>19</sup>                                                                                                                               |
| 1678                | c.1678A>T                 | p.Ile560Phe                     | Missense    | N-terminal     | 0                         | 0                | 3           | 99/100                          | Finsterer 2016 <sup>20</sup>                                                                                                                           |
| 1691                | c.1691C>T                 | p.Thr564Ile                     | Missense    | N-terminal     | 0                         | 0                | 2           | 98/100                          | Keller 2012 <sup>21</sup>                                                                                                                              |
| 1748                | c.1748T>C                 | p.Leu583Pro                     | Missense    | N-terminal     | 0                         | 0                | 1           | 98/100                          | Keller 2012 <sup>21</sup>                                                                                                                              |
| 1790                | c.1790C>T                 | p.Ser597Leu                     | Missense    | N-terminal     | 0                         | 0                | 3           | 99/100                          | Chalabreysse 2011 <sup>22</sup>                                                                                                                        |
| 1816                | c.1816C>T                 | p.Arg606Trp                     | Missense    | N-terminal     | 6                         | 2.39E-05         | 1           | 85/100                          | Gigli 2019 <sup>19</sup>                                                                                                                               |
| 1824                |                           | p.Ile608_609<br>ins30           | Missense    | N-terminal     | 0                         | 0                | 1           | 95/100                          | Norgett 2006 <sup>23</sup>                                                                                                                             |
| 1865                | c.1865T>C                 | p.Leu622Pro                     | Missense    | N-terminal     | 0                         | 0                | 1           | 99/100                          | Bitar 2016 <sup>24</sup>                                                                                                                               |
| 1982                | c.1982A>T                 | p.Asn661Ile                     | Missense    | N-terminal     | 0                         | 0                | 1           | 53/100                          | Cox 2011 <sup>25</sup>                                                                                                                                 |
| 3532                | c.3532C>G                 | p.Leu1178Val                    | Missense    | Rod            | 0                         | 0                | 1           | 97/100                          | Castelletti 2017 <sup>1</sup><br>Quarta 2010 <sup>15</sup>                                                                                             |
| 3550                | c.3550C>T                 | p.Arg1184Trp                    | Missense    | Rod            | 4                         | 1.63E-05         | 7           | 95/100                          | Xue 2019 <sup>26</sup>                                                                                                                                 |

|      |                        |                     |          |            |    |          |   |         |                                                      |
|------|------------------------|---------------------|----------|------------|----|----------|---|---------|------------------------------------------------------|
| 3764 | c.3764G>A              | p.Arg1255Lys        | Missense | Rod        | 6  | 2.44E-05 | 4 | 95/100  | Bauce 2005 <sup>7</sup><br>Rigato 2013 <sup>9</sup>  |
| 3774 | c.3774C>A              | p.Asp1258Glu        | Missense | Rod        | 4  | 1.60E-05 | 2 | 84/100  | Rigato 2013 <sup>9</sup>                             |
| 4043 | c.4043T>G              | p.Leu1348Arg        | Missense | Rod        | 4  | 1.60E-06 | 1 | 92/100  | Bao 2013 <sup>5</sup>                                |
| 4604 | c.4604T>C              | p.Leu1535Pro        | Missense | Rod        | 1  | 4.08E-06 |   | 88/100  | Castelletti 2017 <sup>1</sup>                        |
| 4803 | c.4803G>A              | p.Met1601Ile        | Missense | Rod        | 0  | 0        | 1 | 83/100  | Bauce 2011 <sup>10</sup>                             |
| 4915 | c.4915G>A              | p.Val1639Met        | Missense | Rod        | 10 | 3.99E-05 | 1 | 73/100  | Sato 2015 <sup>4</sup>                               |
| 4961 | c.4961T>C              | p.Leu1654Pro        | Missense | Rod        | 7  | 2.85E-05 | 7 | 82/100  | Bauce 2011 <sup>10</sup><br>Rigato 2013 <sup>9</sup> |
| 4973 | c.4973C>T              | p.Ser1658Phe        | Missense | Rod        | 1  | 3.99E-06 | 1 | 41/100  | Rigato 2013 <sup>9</sup>                             |
| 6166 | c.6166C>G              | p.Gly2056Arg        | Missense | Rod        | 1  | 3.99E-06 | 1 | 100/100 | Christensen 2010 <sup>27</sup>                       |
| 6505 | c.6505C>G              | p.Gln2169Glu        | Missense | C-terminal | 0  | 0        | 1 | 67/100  | Wada 2017 <sup>3</sup>                               |
| 6577 | c.6577G>A              | p.Glu2193Lys        | Missense | C-Terminal | 0  | 0        | 1 | 93/100  | Yesudian 2014 <sup>28</sup>                          |
| 7039 | c.7039V>G              | p.Ile2347Val        | Missense | C-terminal | 3  | 1.19E-05 | 1 | 88/100  | Rigato 2013 <sup>9</sup>                             |
| 7096 | c.7096C>T              | p.Arg2366Cys        | Missense | C-terminal | 0  | 0        | 2 | 98/100  | Peter 2018 <sup>29</sup>                             |
| 7097 | c.7097G>A              | p.Arg2366His        | Missense | C-terminal | 1  | 4.06E-06 | 5 | 98/100  | Al-Owain 2011 <sup>30</sup>                          |
| 7111 | c.7111C>A              | p.Gln2371Lys        | Missense | C-terminal | 0  | 0        | 2 | 99/100  | Molho-Pressach<br>2015 <sup>31</sup>                 |
| 7402 | c.7402G>C              | p.Gly2375Arg        | Missense | C-terminal | 1  | 3.23E-05 | 1 | 99/100  | Alcalai 2003 <sup>32</sup>                           |
| 7430 | c.7430_743<br>3delTGTC | p.Met2477<br>fs8aa* | Missense | C-terminal | 0  | 0        | 2 | 100/100 | Gigli 2019 <sup>19</sup>                             |
| 7516 | c.7516G>A              | p.Arg2339Gln        | Missense | C-terminal | 0  | 0        | 1 | 100/100 | Yu 2008 <sup>33</sup>                                |
| 7623 | c.7623G>T              | p.Arg2541Ser        | Missense | C-terminal | 0  | 0        | 1 | 74/100  | Bao 2013 <sup>5</sup>                                |
| 8050 | c.8050A>G              | p.Met2684Val        | Missense | C-terminal | 3  | 1.22E-05 | 1 | 100/100 | Castelletti 2017 <sup>1</sup>                        |
| 8066 | c.8066A>C              | p.Lys2689Thr        | Missense | C-terminal | 0  | 0        | 1 | 98/100  | Bao 2013 <sup>5</sup>                                |
| 8134 | c.8134G>A              | p.Ala2712Thr        | Missense | C-terminal | 1  | 4.06E-06 | 1 | 100/100 | Elliott 2010 <sup>34</sup>                           |
| 8269 | c.8269G>C              | p.Asp2757His        | Missense | C-terminal | 0  | 0        | 1 | 99/100  | Ohno 2013 <sup>2</sup>                               |
| 8501 | c.8501G>A              | p.Arg2834His        | Missense | C-terminal | 0  | 0        | 1 | 94/100  | Yang 2006 <sup>35</sup>                              |

**Possibly Non-Pathogenic Missense Variants Reported in Literature**

|      |           |              |          |            |      |          |     |         |                                                                                                                |
|------|-----------|--------------|----------|------------|------|----------|-----|---------|----------------------------------------------------------------------------------------------------------------|
| 88   | c.88G>A   | p.Val30Met   | Missense | N-terminal | 352  | 1.51E-03 | 11* | 16/100  | Yang 2006 <sup>35</sup><br>Rasmussen 2013 <sup>36</sup><br>Rigato 2013 <sup>9</sup><br>Haas 2015 <sup>37</sup> |
| 269  | c.269A>G  | p.Gln90Arg   | Missense | N-terminal | 182  | 6.58E-04 | 1   | 100/100 | Yang 2006 <sup>35</sup>                                                                                        |
| 2360 | c.2360A>G | p.Tyr787Cys  | Missense | N-terminal | 31   | 1.12E-04 | 2   | 72/100  | Ohno 2013 <sup>2</sup><br>Wada 2017 <sup>3</sup>                                                               |
| 2422 | c.2422C>T | p.Arg808Cys  | Missense | N-terminal | 77   | 2.70E-04 | 1   | 100/100 | Haas 2015 <sup>37</sup>                                                                                        |
| 2723 | c.2723G>A | p.Arg908His  | Missense | N-terminal | 302  | 1.00E-03 | 1   | 88/100  | Haas 2015 <sup>37</sup>                                                                                        |
| 2815 | c.2815G>A | p.Gly939Ser  | Missense | N-terminal | 1019 | 3.68E-03 | 1   | 83/100  | Fressart 2010 <sup>38</sup>                                                                                    |
| 3862 | c.3862A>C | p.Lys1288Gln | Missense | Rod        | 71   | 2.52E-04 | 1   | 81/100  | Bao 2013 <sup>5</sup>                                                                                          |
| 4117 | c.4117A>G | p.Thr1373Ala | Missense | Rod        | 17   | 6.78E-05 | 1   | 84/100  | Haas 2015 <sup>37</sup>                                                                                        |
| 4372 | c.4372C>G | p.Arg1458Gly | Missense | Rod        | 468  | 0.0016   | 1   | 72/100  | Haas 2015 <sup>37</sup>                                                                                        |
| 4741 | c.4741A>G | p.Leu1581Gly | Missense | Rod        | 54   | 2.20E-04 | 2   | 70/100  | Ohno 2013 <sup>2</sup><br>Wada 2017 <sup>3</sup>                                                               |
| 4775 | c.4775A>G | p.Lys1592Arg | Missense | Rod        | 65   | 0.00023  | 1   | 96/100  | Bohnsale 2015 <sup>13</sup>                                                                                    |
| 5324 | c.5324G>T | p.Arg1775Ile | Missense | Rod        | 17   | 6.14E-05 | 4   | 68/100  | Bauce 2005 <sup>7</sup>                                                                                        |
| 5498 | c.5498A>T | p.Glu1833Val | Missense | Rod        | 2698 | 0.0095   | 1   | 97/100  | Haas 2015 <sup>37</sup>                                                                                        |

|                                                            |                       |                    |            |                |     |          |     |         |                                                                                                                            |
|------------------------------------------------------------|-----------------------|--------------------|------------|----------------|-----|----------|-----|---------|----------------------------------------------------------------------------------------------------------------------------|
| 6307                                                       | c.6307A>G             | p.Lys2103Glu       | Missense   | C-terminal     | 37  | 1.31E-04 | 1   | 98/100  | Gigli 2019 <sup>19</sup>                                                                                                   |
| 6881                                                       | C.6881C>G             | p.Ala2295Gly       | Missense   | C-terminal     | 221 | 0.00078  | 2   | 99/100  | Garcia-Pavia 2011 <sup>39</sup><br>Haas 2015 <sup>37</sup>                                                                 |
| 7916                                                       | c.7916G>A             | p.Arg2639Gln       | Missense   | C-terminal     | 236 | 8.53E-04 | 1   | 100/100 | Sato 2015 <sup>4</sup>                                                                                                     |
| 8455                                                       | c.8455A>C             | p.Met2819Leu       | Missense   | C-terminal     | 526 | 1.91E-03 | 2   | 47/100  | Ohno 2013 <sup>2</sup><br>Wada 2017 <sup>3</sup>                                                                           |
| <b>Literature Reported Pathogenic Truncating Mutations</b> |                       |                    |            |                |     |          |     |         |                                                                                                                            |
| 151                                                        | c.151C>T              | p.Gln51*           | Truncating | N-terminal     | 0   | 0        | 3*  |         | te Riele 2013 <sup>12</sup><br>Bohnsale 2015 <sup>13</sup><br>Groeneweg 2015 <sup>14</sup>                                 |
| 243                                                        | c.243_251delCTTGATGCG | p.Cys81*           | Truncating | N-terminal     |     | 0        | 29  |         | Singh 2018 <sup>40</sup>                                                                                                   |
| 423                                                        | c.423-1G>A            | NA                 | Truncating | N-Terminal     | 0   | 0        | 6*  |         | Bauce 2005 <sup>7</sup><br>Rigato 2013 <sup>9</sup>                                                                        |
| 478                                                        | c.478C>T              | p.Arg160*          | Truncating | N-Terminal/Rod | 0   | 0        | 3*  |         | te Riele 2013 <sup>12</sup><br>Bohnsale 2015 <sup>13</sup><br>Groeneweg 2015 <sup>14</sup>                                 |
| 538                                                        | c.538G>A              | p.Trp180*          | Truncating | N-terminal     | 0   | 0        | 1   |         | Protonotarios 2016 <sup>41</sup>                                                                                           |
| 699                                                        | c.699G>A              | p.Trp233*          | Truncating | N-terminal     | 0   | 0        | 1   |         | Yang 2006 <sup>35</sup>                                                                                                    |
| 808                                                        | c.808C>T              | p.Arg270*          | Truncating | N-terminal     | 0   | 0        | 3   |         | Protonotarios 2016 <sup>41</sup>                                                                                           |
| 817                                                        | c.817C>T              | p.Gln273*          | Truncating | N-terminal     |     | 0        | 4   |         | Rigato 2013 <sup>9</sup>                                                                                                   |
| 818                                                        | c.818dupA             | p.Asn274Glu fs*15  | Truncating | N-terminal     | 0   | 0        | 1   |         | Castelletti 2017 <sup>1</sup>                                                                                              |
| 818                                                        | c.818_819insA         | p.Glu274fs*288     | Truncating | N-terminal     | 0   | 0        | 1   |         | Quatra 2011 <sup>15</sup>                                                                                                  |
| 867                                                        | c.867C>A              | p.Cys298*          | Truncating | N-terminal     | 0   | 0        | 2   |         | Adler 2015 <sup>42</sup>                                                                                                   |
| 928                                                        | c.928dupG             | p.Glu310Gly fs*13  | Truncating | N-terminal     | 0   | 0        | 1   |         | Castelletti 2017 <sup>1</sup>                                                                                              |
| 939                                                        | c.939+1G>A            | NA                 | Truncating | N-terminal     | 1   | 3.19E-05 | 4*  |         | Whitlock 1999 <sup>43</sup><br>Sen-Chowdry 2008 <sup>16</sup><br>Christensen 2010 <sup>27</sup><br>Haas 2015 <sup>37</sup> |
| 940                                                        | c.940_946dupATACGCA   | p.Met316Asn fs*9   | Truncating | N-terminal     | 0   | 0        | 1   |         | Castelletti 2017 <sup>1</sup>                                                                                              |
| 946                                                        | c.946_947insATACGCA   | p.Asn316fs*324     | Truncating | N-terminal     | 0   | 0        | 1   |         | Quatra 2011 <sup>15</sup>                                                                                                  |
| 969                                                        | c.969_974delAAAAGA    | p.Lys324_Glu325del | Truncating | N-terminal     | 0   | 0        | 5   |         | Rasmussen 2013 <sup>36</sup>                                                                                               |
| 991                                                        | c.991C>T              | p.Gln331*          | Truncating | N-terminal     | 0   | 0        | 26  |         | Armstrong 1999 <sup>44</sup><br>Protonotarios 2016 <sup>41</sup>                                                           |
| 1218                                                       | c.1218+1G>A           | NA                 | Splice     | N-terminal     | 0   | 0        | 1   |         | Asimaki 2009 <sup>8</sup>                                                                                                  |
| 1339                                                       | c.1339C>T             | p.Gln447*          | Truncating | N-terminal     | 0   | 0        | 18  |         | Lopez-Ayala 2014 <sup>45</sup>                                                                                             |
| 1755                                                       | c.1755dupA            | p.His586Thr fs*9   | Truncating | N-terminal     | 0   | 0        | 15* |         | Norman 2005 <sup>46</sup><br>Sen-Chowdry 2008 <sup>16</sup><br>Quatra 2011 <sup>15</sup><br>Castelletti 2017 <sup>1</sup>  |
| 1873                                                       | c.1873C>T             | p.Gln625*          | Truncating | N-terminal     | 0   | 0        | 2   |         | Quatra 2011 <sup>15</sup><br>Castelletti 2017 <sup>1</sup>                                                                 |
| 1891                                                       | c.1891C>T             | p.Gln631*          | Truncating | N-terminal     | 0   | 0        | 1   |         | Gigli 2019 <sup>19</sup>                                                                                                   |



|      |                                    |                         |            |            |   |          |     |  |                                                                                                                                                                                                                                                                           |
|------|------------------------------------|-------------------------|------------|------------|---|----------|-----|--|---------------------------------------------------------------------------------------------------------------------------------------------------------------------------------------------------------------------------------------------------------------------------|
| 2130 | c.2130+1G<br>>C                    | NA                      | Truncating | N-terminal | 0 | 0        | 1   |  | Elliot 2010 <sup>34</sup>                                                                                                                                                                                                                                                 |
| 2131 | c.2131-<br>1G>A                    | Splicing defect         | Truncating | N-terminal | 0 | 0        | 3*  |  | Quatra 2011 <sup>15</sup><br>Haas 2015 <sup>37</sup><br>Castelletti 2017 <sup>1</sup>                                                                                                                                                                                     |
| 2390 | c.2390_239<br>3delTCTG             | p.Val797Alafs<br>*14    | Truncating | N-terminal | 0 | 0        | 1   |  | Gigli 2019 <sup>19</sup>                                                                                                                                                                                                                                                  |
| 2765 | c.2765_276<br>6delCA               | p.Thr922Serfs<br>*7     | Truncating | N-terminal | 0 | 0        | 2*  |  | Elliot 2010 <sup>34</sup><br>Castelletti 2017 <sup>1</sup>                                                                                                                                                                                                                |
| 2821 | c.2821C>T                          | p.Arg941*               | Truncating | N-terminal | 0 | 0        | 2   |  | Quatra 2011 <sup>15</sup><br>Castelletti 2017 <sup>1</sup>                                                                                                                                                                                                                |
| 2874 | c.2874del5                         | p.Lys959Metfs<br>*5     | Truncating | N-terminal | 0 | 0        | 1   |  | Bolling 2010 <sup>47</sup>                                                                                                                                                                                                                                                |
| 2878 | c.2878-<br>1G>A                    | Splicing defect         | Truncating | N-terminal | 0 | 0        | 1   |  | Castelletti 2017 <sup>1</sup>                                                                                                                                                                                                                                             |
| 2975 | c.2975C>T                          | p.Gln986*               | Truncating | N-terminal | 0 | 0        | 4   |  | Campuzano 2013 <sup>48</sup>                                                                                                                                                                                                                                              |
| 3045 | c.3045delG                         | p.Ser1015fs*1<br>017    | Truncating | N-terminal | 0 | 0        | 7*  |  | Sen Chowdry 2008 <sup>16</sup><br>Coats 2009 <sup>49</sup><br>Quatra 2011 <sup>15</sup><br>Castelletti 2017 <sup>1</sup>                                                                                                                                                  |
| 3133 | c.3133C>T                          | p.Arg1045*              | Truncating | N-terminal | 0 | 0        | 1   |  | Castelletti 2017 <sup>1</sup>                                                                                                                                                                                                                                             |
| 3153 | c.3153del5                         | NA                      | Truncating | N-terminal | 1 | 0        | 2   |  | Bolling 2010 <sup>47</sup>                                                                                                                                                                                                                                                |
| 3160 | c.3160_316<br>9del<br>AAGAACA<br>A | p.Lys1052fs*2<br>6      | Truncating | N-terminal | 0 | 0        | 2   |  | Bohnsale 2015 <sup>13</sup><br>Groeneweg 2015 <sup>14</sup>                                                                                                                                                                                                               |
| 3203 | c.3203_320<br>4delAG               | p.Glu1068Valf<br>s*19   | Truncating | N-terminal | 0 | 0        | 2   |  | Rigato 2013 <sup>9</sup>                                                                                                                                                                                                                                                  |
| 3316 | c.3316G>T                          | p.Glu1106*              | Truncating | N-terminal | 0 | 0        | 1   |  | Haas 2015 <sup>37</sup>                                                                                                                                                                                                                                                   |
| 3337 | c.3337C>T                          | p.Arg1113*              | Truncating | Rod        | 0 | 0        | 10* |  | Sen-Chowdry 2008 <sup>16</sup><br>Asimaki 2009 <sup>8</sup><br>Rigato 2013 <sup>9</sup><br>Quatra 2011 <sup>15</sup><br>Cox 2011 <sup>25</sup><br>Bohnsale 2015 <sup>13</sup><br>Groeneweg 2015 <sup>14</sup><br>Haas 2015 <sup>37</sup><br>Castelletti 2017 <sup>1</sup> |
| 3415 | c.3415_341<br>7del<br>TATinsG      | p.Tyr1139Glyf<br>s*10   | Truncating | Rod        | 0 | 0        | 1   |  | Reichl 2018 <sup>50</sup>                                                                                                                                                                                                                                                 |
| 3535 | c.3535C>T                          | p.Gln1179*              | Truncating | Rod        | 0 | 0        | 1   |  | Castelletti 2017 <sup>1</sup>                                                                                                                                                                                                                                             |
| 3784 | c.3784C>T                          | p.Gln1262*              | Truncating | Rod        | 0 | 0        | 2   |  | Gigli 2019 <sup>19</sup>                                                                                                                                                                                                                                                  |
| 3801 | c.3799C>T                          | p.Arg1267*              | Truncating | Rod        | 0 | 0        | 1   |  | Uzumcu 2006 <sup>51</sup>                                                                                                                                                                                                                                                 |
| 3805 | c.3805C>T                          | p.Arg1269*              | Truncating | Rod        | 1 | 4.07E-06 | 3   |  | Rasmussen 2013 <sup>36</sup>                                                                                                                                                                                                                                              |
| 3901 | c.3901C>T                          | p.Gly1301*              | Truncating | Rod        | 0 | 0        | 1   |  | Krishnamurthy<br>2011 <sup>52</sup>                                                                                                                                                                                                                                       |
| 3924 | c.3924delG                         | p.His1309Thrf<br>s*1348 | Truncating | Rod        | 0 | 0        | 1   |  | Molho-Pressach<br>2015 <sup>31</sup>                                                                                                                                                                                                                                      |
| 3995 | c.3995_399<br>6del<br>insAATCGA    | p.Ala1332Gluf<br>s*15   | Truncating | Rod        | 0 | 0        | 1   |  | Fressart 2010 <sup>38</sup>                                                                                                                                                                                                                                               |
| 4009 | c.4009_401<br>1delAGG              | p.Glu1337del            | Truncating | Rod        | 0 | 0        | 1   |  | Protonotarios 2016 <sup>41</sup>                                                                                                                                                                                                                                          |
| 4025 | c.4025G>A                          | p.Trp1342*              | Truncating | Rod        | 0 | 0        | 1   |  | Haas 2015 <sup>37</sup>                                                                                                                                                                                                                                                   |
| 4198 | c.4198C>T                          | p.Arg1400*              | Truncating | Rod        | 1 | 4.06E-06 | 4   |  | Bao 2013 <sup>5</sup><br>Wada 2017 <sup>3</sup>                                                                                                                                                                                                                           |

|                                                            |                      |                            |            |            |       |                      |    |  |                                                                                                                        |
|------------------------------------------------------------|----------------------|----------------------------|------------|------------|-------|----------------------|----|--|------------------------------------------------------------------------------------------------------------------------|
| 4395                                                       | C.4395T>G            | p.Tyr1465*                 | Truncating | Rod        | 0     | 0                    | 2  |  | Groeneweg 2015 <sup>14</sup>                                                                                           |
| 4457                                                       | c.4457T>A            | p.Leu1486*                 | Truncating | Rod        | 0     | 0                    | 1  |  | Protonotarios 2016 <sup>41</sup>                                                                                       |
| 4477                                                       | c.4477G>T            | p.Glu1493*                 | Truncating | Rod        | 0     | 0                    | 1  |  | Castelletti 2017 <sup>1</sup>                                                                                          |
| 4536                                                       | c.4536T>A            | p.Tyr1512*                 | Truncating | Rod        | 0     | 0                    | 1  |  | Haas 2015 <sup>37</sup>                                                                                                |
| 4650                                                       | c.4650_4651delTG     | p.Val155Glufs*75           | Truncating | Rod        |       | 0                    | 2  |  | Ramoglu 2017 <sup>53</sup><br>Sakamoto 2019 <sup>54</sup>                                                              |
| 5164                                                       | c.5164G>T            | p.Glu1722*                 | Truncating | Rod        | 0     | 0                    | 1  |  | Haas 2015 <sup>37</sup>                                                                                                |
| 5208                                                       | c.5208_5209delAG     | p.Gly1737fs*5              | Truncating | Rod        | 0     | 0                    | 2  |  | Williams 2011 <sup>55</sup>                                                                                            |
| 5212                                                       | c.5212C>T            | p.Arg1738*                 | Truncating | Rod        | 0     | 0                    | 2  |  | Bohnsale 2015 <sup>13</sup><br>Groeneweg 2015 <sup>14</sup>                                                            |
| 5419                                                       | c.5419C>T            | p.Gln1807*                 | Truncating | Rod        | 0     | 0                    | 2  |  | Groeneweg 2015 <sup>14</sup>                                                                                           |
| 5472                                                       | c.5472delA           | p.Asp1825Thrfs*12          | Truncating | Rod        | 0     | 0                    | 2  |  | Protonotarios 2019 <sup>56</sup>                                                                                       |
| 5596                                                       | c.5596C>T            | p.Gln1866*                 | Truncating | Rod        |       |                      | 4  |  | Navarro-Manchon 2011 <sup>57</sup>                                                                                     |
| 5800                                                       | c.5800C>T            | p.Arg1934*                 | Truncating | C-terminal | 0     | 0                    | 1  |  | Fressart 2010 <sup>38</sup><br>Gigli 2019 <sup>19</sup>                                                                |
| 5999                                                       | c.5999_6000delinsG   | p.Ser2000Trpfs*33          | Truncating | C-terminal | 0     | 0                    | 1  |  | Fressart 2010 <sup>38</sup>                                                                                            |
| 6393                                                       | c.6393delA           | p.Gly2122Valfs*2           | Truncating | C-terminal | 0     | 0                    | 1  |  | Gigli 2019 <sup>19</sup>                                                                                               |
| 6478                                                       | c.6478C>T            | p.Arg2160*                 | Truncating | C-terminal | 1     | 3.98E-06             | 5* |  | te Riele 2013 <sup>12</sup><br>Bohnsale 2015 <sup>13</sup><br>Groeneweg 2015 <sup>14</sup><br>Gigli 2019 <sup>19</sup> |
| 6496                                                       | c.6496C>T            | p.Arg2166*                 | Truncating | C-terminal | 2     | 7.95E-06             | 1  |  | Bohnsale 2015 <sup>13</sup><br>Groeneweg 2015 <sup>14</sup>                                                            |
| 6850                                                       | c.6850C>T            | p.Arg2284*                 | Truncating | C-terminal | 0     | 0                    | 1  |  | Fressart 2010 <sup>38</sup>                                                                                            |
| 7217                                                       | c.7217C>G            | p.Ser2406*                 | Truncating | C-terminal | 0     | 0                    | 1  |  | Protonotarios 2016 <sup>41</sup>                                                                                       |
| 7567                                                       | c.7567delAGA         | p.Lys2523Glnfs*37          | Truncating | C-terminal | 0     | 0                    | 1  |  | Yesudian 2014 <sup>28</sup>                                                                                            |
| 7622                                                       | c.7622delG           | p.Arg2541Lys               | Truncating | C-terminal | 5     | 1.77E-05             | 3* |  | Rigato 2013 <sup>9</sup>                                                                                               |
| 7780                                                       | c.7780delT           | p.Ser2594Profs*8           | Truncating | C-terminal | 0     | 0                    | 1  |  | Rasmussen 2013 <sup>36</sup>                                                                                           |
| 7891                                                       | c.7891dupG           | p.Ile2631Asnfs*13          | Truncating | C-terminal | 0     | 0                    | 1  |  | Gigli 2019 <sup>19</sup>                                                                                               |
| 7901                                                       | c.7901delG           |                            | Truncating | C-terminal | 0     | 0                    | 12 |  | Norgett 2000 <sup>58</sup>                                                                                             |
| 7999                                                       | c.7999C>T            | p.Gln2667*                 | Truncating | C-terminal | 0     | 0                    | 1  |  | Fressart 2010 <sup>38</sup>                                                                                            |
| 8077                                                       | c.8077_8080delAAAG   | p.Lys2693Profs*3           | Truncating | C-terminal | 0     | 0                    | 1  |  | Castelletti 2017 <sup>1</sup>                                                                                          |
| 8188                                                       | c.8188delC           | p.Gln2730Serfs*16          | Truncating | C-terminal | 0     | 0                    | 1  |  | Castelletti 2017 <sup>1</sup>                                                                                          |
| 8195                                                       | c.8195_8195dupTC     | p.Thr2733Serfs*14          | Truncating | C-terminal | 0     | 0                    | 1  |  | Castelletti 2017 <sup>1</sup>                                                                                          |
| 8290                                                       | c.8290_8291insTGCT   | p.Ala2765fs*2787           | Truncating | C-terminal | 0     | 0                    | 1  |  | Garcia-Pavia 2011 <sup>39</sup>                                                                                        |
| <b>Literature Reported Common Truncating Variants</b>      |                      |                            |            |            |       |                      |    |  |                                                                                                                        |
| 273                                                        | c.273+5G>A           | NA                         | Splice     | N-terminal | 79    | 2.81E-04             | 3  |  | Rigato 2013 <sup>9</sup>                                                                                               |
| <b>Literature Reported Compound Heterozygote Mutations</b> |                      |                            |            |            |       |                      |    |  |                                                                                                                        |
| 88                                                         | c.88G>A<br>c.7622G>A | p.Val30Met<br>p.Arg2541Lys | Missense   | N-terminal | 352/5 | 1.51E03/<br>1.77E-05 | 1  |  | Bauce 2010 <sup>59</sup>                                                                                               |

|      |                                    |                                       |                         |                           |          |                |   |  |                                |
|------|------------------------------------|---------------------------------------|-------------------------|---------------------------|----------|----------------|---|--|--------------------------------|
| 478  | c.478C>T<br>c.3630T>A              | p.Arg160*<br>p.Thr1210*               | Truncating              | N-terminal                | 0        | 0              | 1 |  | Bari 2018 <sup>60</sup>        |
| 1990 | C.1990C>T<br>c.7096C>T             | p.Gln664*<br>Arg2366Cys               | Truncating/<br>Missense | N-terminal/<br>C-terminal | 0        | 0/0            | 1 |  | Whitlock 2002 <sup>61</sup>    |
| 2019 |                                    | p.Gln673*<br>Gln1446*                 | Truncating              | N-terminal/<br>Rod        | 0        | 0/0            | 2 |  | Asimaki 2009 <sup>62</sup>     |
| 2427 | c.2427T>A<br>c.861T>G              | p.Cys809*<br>Asn287Lys                | Truncating/<br>Missense | N-terminal                | 0        | 0/0            | 1 |  | Whitlock 2002 <sup>61</sup>    |
| 2516 | c.2516del4<br>c.3971del4           |                                       | Truncating              | N-terminal                | 0        | 0/0            | 1 |  | Tanaka 2009 <sup>63</sup>      |
| 3564 | c.3564T>A<br>c.4395T>A             | p.Tyr1188*<br>p.Tyr1465*              | Truncating              | Rod                       | 0        | 0/0            | 1 |  | Tekin 2017 <sup>64</sup>       |
| 4198 | c.4198C>T<br>c.6850C>T             | p.Arg1400*<br>p.Arg2284*              | Truncating              | Rod/<br>C-terminal        | 0        | 0/0            | 1 |  | Antonov 2015 <sup>65</sup>     |
| 4778 | c.4778-<br>4790del13<br>c.6310delA | p.Lys1593Serfs*5<br>p.Thr2104Glnfs*12 | Truncating              | Rod                       | 0/<br>13 | 0/<br>0.000052 | 1 |  | Vahlquist 2014 <sup>66</sup>   |
| 5800 | c.5800C>T<br>c.6370delT<br>T       | p.Arg1934*                            | Truncating              | C-terminal                | 0        | 0/0            | 1 |  | Jonkman 2005 <sup>67</sup>     |
| 6496 | c.6496C>T<br>c.6610C>T             | p.Arg2166*<br>p.Gly2204*              | Truncating              | C-terminal                | 2        | 7.954E-<br>06  | 2 |  | Kim 2017 <sup>68</sup>         |
| 6968 | c.6968T>C<br>c.7123G>C             | p.Leu2329Pro<br>p.Gly2375Arg          | Missense                | C-terminal                | 0        | 0/0            | 2 |  | Yermakovich 2018 <sup>69</sup> |
| 7096 | c.7096C>T<br>c.6721del             | p.Arg2366Cys<br>p.Ile2241Phefs*3      | Missense/<br>Truncating | C-terminal                | 0/0      | 0/0            | 1 |  | Peter 2018 <sup>29</sup>       |
| 7964 | c.7964C>A<br>c.6310delA            | p.Ala2655Asp<br>PTC                   | PTC                     | C-terminal/<br>Rod        | 0/<br>13 | 0/<br>0.000052 | 1 |  | Mahoney 2010 <sup>70</sup>     |

**Supplemental Table 1: Previously reported desmoplakin genetic variants from literature review**

| cDNA Mutation Designation | Amino Acid Mutation Designation | Consequence | Total Case Number | Total Proband Number | gNomad Frequency |
|---------------------------|---------------------------------|-------------|-------------------|----------------------|------------------|
| c.1_8616del               | p.Met1_*2872del                 | Truncating  | 1                 | 1                    | 0                |
| c.268C>T                  | p.Q90*                          | Truncating  | 4                 | 1                    | 0                |
| c.273+5G>A                | NA                              | Truncating  | 4                 | 2                    | 0                |
| c.478C>T                  | p.Arg160*                       | Truncating  | 11                | 4                    | 0                |
| c.479C>T                  | p.Arg160*                       | Truncating  | 2                 | 1                    | 0                |
| c.491_492delins15         | p.Ala164fs*23                   | Truncating  | 1                 | 1                    | 0                |
| c.534_535insA             | p.Gly179Argfs*4                 | Truncating  | 1                 | 1                    | 0                |
| NA                        | p.Gln216Pro                     | Missense    | 3                 | 1                    | 0                |
| c.699G>A                  | p.Trp233*                       | Truncating  | 1                 | 1                    | 0                |
| c.712_713insA             | p.Ile238fs*19                   | Truncating  | 1                 | 0                    | 0                |
| c.939+1G>A                | NA                              | Truncating  | 4                 | 3                    | 1                |
| c.1146delT                | p.Phe382fs*11                   | Truncating  | 9                 | 2                    | 0                |
| c.1615C>T                 | p.Gln539*                       | Truncating  | 1                 | 1                    | 0                |
| c.1751delA                | p.Glu584Glyfs*52                | Truncating  | 2                 | 1                    | 0                |
| c.1762C>T                 | p.Gln588*                       | Truncating  | 3                 | 1                    | 0                |
| NA                        | p.Glu671Serfs*9                 | Truncating  | 3                 | 1                    | 0                |
| c.2547T>A                 | p.Tyr849*                       | Truncating  | 1                 | 0                    | 0                |
| c.2593_2594dupGA          | NA                              | Truncating  | 1                 | 1                    | 0                |
| c.3160_3169delAAGAACAAAT  | p.Lys1054fs*26                  | Truncating  | 7                 | 1                    | 0                |
| C.3195C>G                 | p.Tyr1065*                      | Truncating  | 2                 | 1                    | 0                |
| c.3474_3475insA           | p.Glu1159Argfs*3                | Truncating  | 9                 | 1                    | 0                |
| c.3526delG                | p.Val1176Phefs*20               | Truncating  | 2                 | 2                    | 0                |
| c.3630T>A                 | p.Tyr1210*                      | Truncating  | 4                 | 1                    | 0                |
| c.3735_3741dupAAATCGA     | p.Asp1248Lysfs*7                | Truncating  | 1                 | 1                    | 1                |
| NA                        | p.Gln1453Serfs*13               | Truncating  | 2                 | 1                    | 0                |
| c.4372C>T                 | p.Arg1458*                      | Truncating  | 1                 | 1                    | 1                |
| c.4531C>T                 | p.Gln1511*                      | Truncating  | 7                 | 2                    | 5                |
| c.4822C>T                 | p.Gln1608*                      | Truncating  | 2                 | 1                    | 0                |
| c.4824dupA                | p.Ala1609fs                     | Truncating  | 3                 | 1                    | 0                |
| c.5851C>T                 | p.Arg1951*                      | Truncating  | 1                 | 1                    | 0                |
| c.6398dupG                | p.val2134cysfs*22               | Truncating  | 2                 | 1                    | 0                |
| c.6758delT                | p.F2253Sfs*8                    | Truncating  | 1                 | 1                    | 0                |
| c.6850C>T                 | p.Arg2284*                      | Truncating  | 1                 | 1                    | 0                |
| c.7780dupT                | NA                              | Truncating  | 2                 | 1                    | 0                |
| c.8173del                 | p.Arg2725Alafs*21               | Truncating  | 1                 | 1                    | 0                |
| c.8384_8385insTAGA        | p.Glu2795Aspfs                  | Truncating  | 1                 | 1                    | 0                |
| Exon 21&24 del            | NA                              | Truncating  | 1                 | 1                    | 0                |

**Supplemental Table 2: Desmoplakin mutations present in study**

| cDNA Mutation Designation                 | Amino Acid Mutation Designation | Consequence | Total Case Number | Total Proband Number | gNomad Frequency |
|-------------------------------------------|---------------------------------|-------------|-------------------|----------------------|------------------|
| c.148_151delACAG                          | Thr50Serfs*61                   | Truncating  | 7                 | 1                    | 0                |
| c.235C>T                                  | p.Arg79*                        | Truncating  | 7                 | 2                    | 1                |
| c.337-2A>T                                | Splice                          | Truncating  | 9                 | 1                    | 0                |
| c368G>A                                   | Trp123*                         | Truncating  | 1                 | 1                    | 0                |
| c.489_513delCAGCGAT<br>TACCAGTACAGCCAGAGA | His163Glnfs*19                  | Truncating  | 1                 | 1                    | 0                |
| c.623delC                                 | Thr208Lysfs*55                  | Truncating  | 1                 | 0                    | 0                |
| c.772A>T                                  | p.Lys258*                       | Truncating  | 1                 | 1                    | 0                |
| c.951delG                                 | p.His318Thrfs*2                 | Truncating  | 2                 | 0                    | 0                |
| c.1034+1G>T                               | Splice                          | Truncating  | 2                 | 1                    | 0                |
| c.1170+2T>A                               | Splice                          | Truncating  | 2                 | 1                    | 0                |
| c.1211dup                                 | p.Val406Serfs*4                 | Truncating  | 5                 | 2                    | 0                |
| c.1237C>T                                 | p.Arg413*                       | Truncating  | 1                 | 0                    | 4                |
| c.1252delG                                | Ala418Profs*2                   | Truncating  | 1                 | 0                    | 0                |
| c.1378+2T>A                               | Splice                          | Truncating  | 1                 | 0                    | 1                |
| c.1613G>A                                 | p.Trp538*                       | Truncating  | 1                 | 1                    | 4                |
| c.1643delG                                | p.Gly548Valfs*15                | Truncating  | 2                 | 0                    | 0                |
| c.1912C>T                                 | p.Gln638*                       | Truncating  | 1                 | 1                    | 2                |
| c.1952_1955dupGAAG                        | p.Ser652Argfs*92                | Truncating  | 3                 | 1                    | 0                |
| c.2119C>T                                 | p.Gln707*                       | Truncating  | 1                 | 1                    | 0                |
| c.2146-1G>C                               | Splice                          | Truncating  | 14                | 4                    | 9                |
| c.2197_2202delinsG                        | p.His733Alafs*8                 | Truncating  | 3                 | 2                    | 6                |
| c.2203C>T                                 | p.Arg735*                       | Truncating  | 2                 | 1                    | 1                |
| c.2489+1G>A                               | Splice                          | Truncating  | 8                 | 4                    | 8                |
| c.2509delA                                | p.Ser837Valfs*94                | Truncating  | 2                 | 2                    | 0                |
| Deletion of exons 6-7                     | NA                              | Truncating  | 1                 | 0                    | 0                |
| Deletion exons 5-7                        | NA                              | Truncating  | 1                 | 1                    | 0                |
| Unknown deletion                          | NA                              | NA          | 1                 | 0                    | NA               |

**Supplemental Table 3: Plakophilin 2 mutations present in study**

|                                            | <b>Normal Ventricular Function<br/>(N=47)</b> | <b>Predominant RV involvement<br/>(N=32)</b> | <b>p-value</b>   |
|--------------------------------------------|-----------------------------------------------|----------------------------------------------|------------------|
| Female                                     | 45%                                           | 62%                                          | 0.17             |
| Age at Evaluation (in years)               | 40 ± 22                                       | 36 ± 18                                      | 0.35             |
| Palmoplantar Keratoderma and/or Curly Hair | 4% (1/23)                                     | 0% (0/23)                                    | 1.0              |
| <b>Proband</b>                             | <b>28%</b>                                    | <b>66%</b>                                   | <b>0.001</b>     |
| <b>LV Enlargement</b>                      | <b>4.3%</b>                                   | <b>25%</b>                                   | <b>0.012</b>     |
| <b>LV Systolic Dysfunction</b>             | <b>0%</b>                                     | 16%                                          | <b>0.009</b>     |
| <b>LVEF (%)</b>                            | <b>62 ± 5</b>                                 | <b>55 ± 10</b>                               | <b>0.001</b>     |
| <b>RV Systolic Dysfunction</b>             | <b>0%</b>                                     | <b>84%</b>                                   | <b>&lt;0.001</b> |
| <b>RV Focal WMA</b>                        | <b>0% (0/24)</b>                              | <b>59% (16/27)</b>                           | <b>&lt;0.001</b> |
| ECG T wave inversions (V1-2)               | 11% (5/45)                                    | 16% (5/31)                                   | 0.73             |
| <b>ECG T wave inversions (V1-3)</b>        | <b>27% (12/45)</b>                            | <b>84% (26/31)</b>                           | <b>&lt;0.001</b> |
| ECG T wave inversions (V4-6)               | 11% (5/45)                                    | 39% (12/31)                                  | <0.001           |
| <b>Frequent PVCs (&gt;500/24h)</b>         | <b>40% (8/20)</b>                             | <b>83% (15/18)</b>                           | <b>0.009</b>     |
| LV LGE                                     | 0% (0/25)                                     | 19% (5/26)                                   | 0.05             |
| <b>RVEDV (mL) (MRI)</b>                    | <b>164 ± 39 (n=19)</b>                        | <b>207 ± 70 (n=27)</b>                       | <b>0.020</b>     |
| LVEDV (mL) (MRI)                           | 149 ± 32 (n=19)                               | 160 ± 69 (n=26)                              | 0.49             |
| <b>ARVC Task Force Diagnosis</b>           |                                               |                                              | <b>&lt;0.001</b> |
| Possible                                   | <b>55%</b><br><b>p=0.001</b>                  | <b>9%</b><br><b>p=0.001</b>                  |                  |
| Borderline                                 | 17%<br>p=0.9                                  | 9%<br>p=0.9                                  |                  |
| Definite                                   | <b>28%</b><br><b>p&lt;0.001</b>               | <b>67%</b><br><b>p&lt;0.001</b>              |                  |
| <b>VT Outcome</b>                          | <b>15%</b>                                    | <b>53%</b>                                   | <b>&lt;0.001</b> |

**Supplemental Table 4. PKP2 Cohort Clinical Characteristics Stratified by Ventricular Predominance Subgroup**

LV: Left ventricle, LVEF: Left ventricle ejection fraction, RV: Right Ventricle, WMA: Wall motion abnormality, PVC: Premature ventricular contraction, LGE: Late gadolinium enhancement, EDV: End diastolic volume, MRI: Magnetic resonance imaging, VT: Ventricular tachycardia.

| <b>Gender</b>             | <b>Male, n=33</b> | <b>Female, n=74</b> | <b>p-value</b> |
|---------------------------|-------------------|---------------------|----------------|
| Age at evaluation         | 36.7 ± 17         | 35.6 ± 15           | 0.75           |
| Proband                   | 42%               | 41%                 | 1              |
| Hair/Skin Changes         | 55% (17/31)       | 55% (37/67)         | 1              |
| Chest Pain                | 18%               | 22%                 | 0.79           |
| Troponin Elevation        | 12%               | 16%                 | 0.77           |
| Frequent PVCs (>500/24hr) | 47% (8/17)        | 60% (24/40)         | 0.39           |
| LGE                       | 37% (7/19)        | 42% (16/38)         | 0.78           |
| LV enlargement            | 33% (10/30)       | 37% (26/70)         | 0.82           |
| LVEF (%)                  | 46.3 ± 13 (n=31)  | 46.6 ± 15% n=72)    | 0.92           |
| RV Systolic Dysfunction   | 11% (8/31)        | 26% (8/72)          | 0.059          |
| VT Outcome                | 33%               | 26%                 | 0.49           |

**Supplemental Table 5. Gender Characteristics in Desmoplakin Carriers**

PVC: Premature ventricular contraction, LGE: Late gadolinium enhancement, LV: Left ventricle, LVEF: Left ventricle ejection fraction, RV: Right Ventricle, VT: Ventricular tachycardia

## References

1. Castelletti S, Vischer AS, Syrris P, Crotti L, Spazzolini C, Ghidoni A, Parati G, Jenkins S, Kotta MC, McKenna WJ, et al. Desmoplakin missense and non-missense mutations in arrhythmogenic right ventricular cardiomyopathy: Genotype-phenotype correlation. *Int J Cardiol.* 2017;249:268-273. doi: 10.1016/j.ijcard.2017.05.018.
2. Ohno S, Nagaoka I, Fukuyama M, Kimura H, Itoh H, Makiyama T, Shimizu A and Horie M. Age-dependent clinical and genetic characteristics in Japanese patients with arrhythmogenic right ventricular cardiomyopathy/dysplasia. *Circ J.* 2013;77:1534-1542. doi: 10.1253/circj.cj-12-1446.
3. Wada Y, Ohno S, Aiba T and Horie M. Unique genetic background and outcome of non-Caucasian Japanese probands with arrhythmogenic right ventricular dysplasia/cardiomyopathy. *Mol Genet Genomic Med.* 2017;5:639-651. doi: 10.1002/mgg3.311.
4. Sato T, Nishio H and Suzuki K. Identification of arrhythmogenic right ventricular cardiomyopathy-causing gene mutations in young sudden unexpected death autopsy cases. *J Forensic Sci.* 2015;60:457-461. doi: 10.1111/1556-4029.12657.
5. Bao J, Wang J, Yao Y, Wang Y, Fan X, Sun K, He DS, Marcus FI, Zhang S, Hui R, et al. Correlation of ventricular arrhythmias with genotype in arrhythmogenic right ventricular cardiomyopathy. *Circ Cardiovasc Genet.* 2013;6:552-556. doi: 10.1161/circgenetics.113.000122.
6. Rampazzo A, Nava A, Malacrida S, Beffagna G, Bauce B, Rossi V, Zimbello R, Simionati B, Basso C, Thiene G, et al. Mutation in human desmoplakin domain binding to plakoglobin causes a dominant form of arrhythmogenic right ventricular cardiomyopathy. *Am J Hum Genet.* 2002;71:1200-1206. doi: 10.1086/344208.
7. Bauce B, Basso C, Rampazzo A, Beffagna G, Daliento L, Frigo G, Malacrida S, Settimo L, Danieli G, Thiene G, et al. Clinical profile of four families with arrhythmogenic right ventricular cardiomyopathy caused by dominant desmoplakin mutations. *Eur Heart J.* 2005;26:1666-1675. doi: 10.1093/eurheartj/ehi341.
8. Asimaki A, Tandri H, Huang H, Halushka MK, Gautam S, Basso C, Thiene G, Tsatsopoulou A, Protonotarios N, McKenna WJ, et al. A new diagnostic test for arrhythmogenic right ventricular cardiomyopathy. *N Engl J Med.* 2009;360:1075-1084. doi: 10.1056/NEJMoa0808138.
9. Rigato I, Bauce B, Rampazzo A, Zorzi A, Pilichou K, Mazzotti E, Migliore F, Marra MP, Lorenzon A, De Bortoli M, et al. Compound and digenic heterozygosity predicts lifetime arrhythmic outcome and sudden cardiac death in desmosomal gene-related arrhythmogenic right ventricular cardiomyopathy. *Circ Cardiovasc Genet.* 2013;6:533-542. doi: 10.1161/circgenetics.113.000288.
10. Bauce B, Rampazzo A, Basso C, Mazzotti E, Rigato I, Steriotis A, Beffagna G, Lorenzon A, De Bortoli M, Pilichou K, et al. Clinical phenotype and diagnosis of arrhythmogenic right ventricular cardiomyopathy in pediatric patients carrying desmosomal gene mutations. *Heart Rhythm.* 2011;8:1686-1695. doi: 10.1016/j.hrthm.2011.06.026.
11. Tan BY, Jain R, den Haan AD, Chen Y, Dalal D, Tandri H, Amat-Alarcon N, Daly A, Tichnell C, James C, et al. Shared desmosome gene findings in early and late onset arrhythmogenic right ventricular dysplasia/cardiomyopathy. *J Cardiovasc Transl Res.* 2010;3:663-673. doi: 10.1007/s12265-010-9224-4.
12. te Riele AS, Bhonsale A, James CA, Rastegar N, Murray B, Burt JR, Tichnell C, Madhavan S, Judge DP, Bluemke DA, et al. Incremental value of cardiac magnetic resonance imaging in arrhythmic risk stratification of arrhythmogenic right ventricular dysplasia/cardiomyopathy-associated desmosomal mutation carriers. *J Am Coll Cardiol.* 2013;62:1761-1769. doi: 10.1016/j.jacc.2012.11.087.



13. Bhonsale A, Groeneweg JA, James CA, Dooijes D, Tichnell C, Jongbloed JD, Murray B, te Riele AS, van den Berg MP, Bikker H, et al. Impact of genotype on clinical course in arrhythmogenic right ventricular dysplasia/cardiomyopathy-associated mutation carriers. *Eur Heart J*. 2015;36:847-855. doi: 10.1093/eurheartj/ehu509.
14. Groeneweg JA, Bhonsale A, James CA, te Riele AS, Dooijes D, Tichnell C, Murray B, Wiesfeld AC, Sawant AC, Kassamali B, et al. Clinical Presentation, Long-Term Follow-Up, and Outcomes of 1001 Arrhythmogenic Right Ventricular Dysplasia/Cardiomyopathy Patients and Family Members. *Circ Cardiovasc Genet*. 2015;8:437-446. doi: 10.1161/circgenetics.114.001003.
15. Quarta G, Muir A, Pantazis A, Syrris P, Gehmlich K, Garcia-Pavia P, Ward D, Sen-Chowdhry S, Elliott PM and McKenna WJ. Familial evaluation in arrhythmogenic right ventricular cardiomyopathy: impact of genetics and revised task force criteria. *Circulation*. 2011;123:2701-2709. doi: 10.1161/circulationaha.110.976936.
16. Sen-Chowdhry S, Syrris P, Prasad SK, Hughes SE, Merrifield R, Ward D, Pennell DJ and McKenna WJ. Left-dominant arrhythmogenic cardiomyopathy: an under-recognized clinical entity. *J Am Coll Cardiol*. 2008;52:2175-2187. doi: 10.1016/j.jacc.2008.09.019.
17. den Haan AD, Tan BY, Zikusoka MN, Llado LI, Jain R, Daly A, Tichnell C, James C, Amat-Alarcon N, Abraham T, et al. Comprehensive desmosome mutation analysis in north americans with arrhythmogenic right ventricular dysplasia/cardiomyopathy. *Circ Cardiovasc Genet*. 2009;2:428-435. doi: 10.1161/circgenetics.109.858217.
18. Jan A, Basit S, Wakil SM, Ramzan K and Ahmad W. A novel homozygous variant in the dsp gene underlies the first case of non-syndromic form of alopecia. *Arch Dermatol Res*. 2015;307:793-801. doi: 10.1007/s00403-015-1590-y.
19. Gigli M, Merlo M, Graw SL, Barbati G, Rowland TJ, Slavov DB, Stolfo D, Haywood ME, Dal Ferro M, Altinier A, et al. Genetic Risk of Arrhythmic Phenotypes in Patients With Dilated Cardiomyopathy. *J Am Coll Cardiol*. 2019;74:1480-1490. doi: 10.1016/j.jacc.2019.06.072.
20. Finsterer J, Stollberger C, Wollmann E, Dertinger S and Laccone F. Autosomal dominant Carvajal plus syndrome due to the novel desmoplakin mutation c.1678A > T (p.Ile560Phe). *Mol Genet Metab Rep*. 2016;8:1-3. doi: 10.1016/j.ymgmr.2016.05.005.
21. Keller DI, Stepowski D, Balmer C, Simon F, Guenthard J, Bauer F, Itin P, David N, Drouin-Garraud V and Fressart V. De novo heterozygous desmoplakin mutations leading to Naxos-Carvajal disease. *Swiss Med Wkly*. 2012;142:w13670. doi: 10.4414/smw.2012.13670.
22. Chalabreysse L, Senni F, Bruyere P, Aime B, Ollagnier C, Bozio A and Bouvagnet P. A new hypo/oligodontia syndrome: Carvajal/Naxos syndrome secondary to desmoplakin-dominant mutations. *J Dent Res*. 2011;90:58-64. doi: 10.1177/0022034510383984.
23. Norgett EE, Lucke TW, Bowers B, Munro CS, Leigh IM and Kelsell DP. Early death from cardiomyopathy in a family with autosomal dominant striate palmoplantar keratoderma and woolly hair associated with a novel insertion mutation in desmoplakin. *J Invest Dermatol*. 2006;126:1651-1654. doi: 10.1038/sj.jid.5700291.
24. Bitar F, Najjar T, Hayashi R, Nemer G, Shigehara Y, Hamie L, Abbas O, Kibbi AG, Shimomura Y and Kurban M. A novel heterozygous mutation in desmoplakin gene in a Lebanese patient with Carvajal syndrome and tooth agenesis. *J Eur Acad Dermatol Venereol*. 2016;30:e217-e219. doi: 10.1111/jdv.13549.
25. Cox MG, van der Zwaag PA, van der Werf C, van der Smagt JJ, Noorman M, Bhuiyan ZA, Wiesfeld AC, Volders PG, van Langen IM, Atsma DE, et al. Arrhythmogenic right ventricular

dysplasia/cardiomyopathy: pathogenic desmosome mutations in index-patients predict outcome of family screening: Dutch arrhythmogenic right ventricular dysplasia/cardiomyopathy genotype-phenotype follow-up study. *Circulation*. 2011;123:2690-2700. doi: 10.1161/circulationaha.110.988287.

26. Xue K, Zheng Y and Cui Y. A novel heterozygous missense mutation of DSP in a Chinese Han pedigree with palmoplantar keratoderma. *J Cosmet Dermatol*. 2019;18:371-376. doi: 10.1111/jocd.12533.

27. Christensen AH, Benn M, Bundgaard H, Tybjaerg-Hansen A, Haunso S and Svendsen JH. Wide spectrum of desmosomal mutations in Danish patients with arrhythmogenic right ventricular cardiomyopathy. *J Med Genet*. 2010;47:736-744. doi: 10.1136/jmg.2010.077891.

28. Yesudian PD, Cabral RM, Ladusans E, Spinty S, Gibbs J, Fryer A, Christiano AM and Mendelsohn SS. Novel compound heterozygous mutations in the desmoplakin gene cause hair shaft abnormalities and culminate in lethal cardiomyopathy. *Clin Exp Dermatol*. 2014;39:506-508. doi: 10.1111/ced.12329.

29. Peter DCV, Thomas M, Wilson NJ and Smith FJD. Skin fragility, woolly hair syndrome with a desmoplakin mutation - a case from India. *Int J Dermatol*. 2018;57:e73-e75. doi: 10.1111/ijd.14096.

30. Al-Owain M, Wakil S, Shareef F, Al-Fatani A, Hamadah E, Haider M, Al-Hindi H, Awaji A, Khalifa O, Baz B, et al. Novel homozygous mutation in DSP causing skin fragility-woolly hair syndrome: report of a large family and review of the desmoplakin-related phenotypes. *Clin Genet*. 2011;80:50-58. doi: 10.1111/j.1399-0004.2010.01518.x.

31. Molho-Pessach V, Sheffer S, Siam R, Tams S, Siam I, Awwad R, Babay S, Golender J, Simanovsky N, Ramot Y, et al. Two Novel Homozygous Desmoplakin Mutations in Carvajal Syndrome. *Pediatr Dermatol*. 2015;32:641-646. doi: 10.1111/pde.12541.

32. Alcalai R, Metzger S, Rosenheck S, Meiner V and Chajek-Shaul T. A recessive mutation in desmoplakin causes arrhythmogenic right ventricular dysplasia, skin disorder, and woolly hair. *J Am Coll Cardiol*. 2003;42:319-327. doi: 10.1016/s0735-1097(03)00628-4.

33. Yu CC, Yu CH, Hsueh CH, Yang CT, Juang JM, Hwang JJ, Lin JL and Lai LP. Arrhythmogenic right ventricular dysplasia: clinical characteristics and identification of novel desmosome gene mutations. *J Formos Med Assoc*. 2008;107:548-558. doi: 10.1016/s0929-6646(08)60168-0.

34. Elliott P, O'Mahony C, Syrris P, Evans A, Rivera Sorensen C, Sheppard MN, Carr-White G, Pantazis A and McKenna WJ. Prevalence of desmosomal protein gene mutations in patients with dilated cardiomyopathy. *Circ Cardiovasc Genet*. 2010;3:314-322. doi: 10.1161/circgenetics.110.937805.

35. Yang Z, Bowles NE, Scherer SE, Taylor MD, Kearney DL, Ge S, Nadvoretzkiy VV, DeFreitas G, Carabello B, Brandon LI, et al. Desmosomal dysfunction due to mutations in desmoplakin causes arrhythmogenic right ventricular dysplasia/cardiomyopathy. *Circ Res*. 2006;99:646-655. doi: 10.1161/01.RES.0000241482.19382.c6.

36. Rasmussen TB, Hansen J, Nissen PH, Palmfeldt J, Dalager S, Jensen UB, Kim WY, Heickendorff L, Molgaard H, Jensen HK, et al. Protein expression studies of desmoplakin mutations in cardiomyopathy patients reveal different molecular disease mechanisms. *Clin Genet*. 2013;84:20-30. doi: 10.1111/cge.12056.

37. Haas J, Frese KS, Peil B, Kloos W, Keller A, Nietsch R, Feng Z, Muller S, Kayvanpour E, Vogel B, et al. Atlas of the clinical genetics of human dilated cardiomyopathy. *Eur Heart J*. 2015;36:1123-1135a. doi: 10.1093/eurheartj/ehu301.

38. Fressart V, Duthoit G, Donal E, Probst V, Deharo JC, Chevalier P, Klug D, Dubourg O, Delacretaz E, Cosnay P, et al. Desmosomal gene analysis in arrhythmogenic right ventricular

dysplasia/cardiomyopathy: spectrum of mutations and clinical impact in practice. *Europace*. 2010;12:861-868. doi: 10.1093/europace/euq104.

39. Garcia-Pavia P, Syrris P, Salas C, Evans A, Mirelis JG, Cobo-Marcos M, Vilches C, Bornstein B, Segovia J, Alonso-Pulpon L, et al. Desmosomal protein gene mutations in patients with idiopathic dilated cardiomyopathy undergoing cardiac transplantation: a clinicopathological study. *Heart*. 2011;97:1744-1752. doi: 10.1136/hrt.2011.227967.

40. Singh SM, Casey SA, Berg AA, Abdelhadi RH, Katsiyannis WT, Bennett MK, Mackey-Bojack S, Duncanson ER and Sengupta JD. Autosomal-dominant biventricular arrhythmogenic cardiomyopathy in a large family with a novel in-frame DSP nonsense mutation. *Am J Med Genet A*. 2018;176:1622-1626. doi: 10.1002/ajmg.a.38719.

41. Protonotarios A, Anastasakis A, Panagiotakos DB, Antoniadis L, Syrris P, Vouliotis A, Stefanadis C, Tsatsopoulou A, McKenna WJ and Protonotarios N. Arrhythmic risk assessment in genotyped families with arrhythmogenic right ventricular cardiomyopathy. *Europace*. 2016;18:610-616. doi: 10.1093/europace/euv061.

42. Adler A, Perrin MJ, Spears D and Gollob MH. Epsilon wave uncovered by exercise test in a patient with desmoplakin-positive arrhythmogenic right ventricular cardiomyopathy. *Can J Cardiol*. 2015;31:819.e811-812. doi: 10.1016/j.cjca.2015.01.025.

43. Whittock NV, Ashton GH, Dopping-Hepenstal PJ, Gratian MJ, Keane FM, Eady RA and McGrath JA. Striate palmoplantar keratoderma resulting from desmoplakin haploinsufficiency. *J Invest Dermatol*. 1999;113:940-946. doi: 10.1046/j.1523-1747.1999.00783.x.

44. Armstrong DK, McKenna KE, Purkis PE, Green KJ, Eady RA, Leigh IM and Hughes AE. Haploinsufficiency of desmoplakin causes a striate subtype of palmoplantar keratoderma. *Hum Mol Genet*. 1999;8:143-148. doi: 10.1093/hmg/8.1.143.

45. Lopez-Ayala JM, Gomez-Milanes I, Sanchez Munoz JJ, Ruiz-Espejo F, Ortiz M, Gonzalez-Carrillo J, Lopez-Cuenca D, Oliva-Sandoval MJ, Monserrat L, Valdes M, et al. Desmoplakin truncations and arrhythmogenic left ventricular cardiomyopathy: characterizing a phenotype. *Europace*. 2014;16:1838-1846. doi: 10.1093/europace/euu128.

46. Norman M, Simpson M, Mogensen J, Shaw A, Hughes S, Syrris P, Sen-Chowdhry S, Rowland E, Crosby A and McKenna WJ. Novel mutation in desmoplakin causes arrhythmogenic left ventricular cardiomyopathy. *Circulation*. 2005;112:636-642. doi: 10.1161/circulationaha.104.532234.

47. Bolling MC, Veenstra MJ, Jonkman MF, Diercks GF, Curry CJ, Fisher J, Pas HH and Bruckner AL. Lethal acantholytic epidermolysis bullosa due to a novel homozygous deletion in DSP: expanding the phenotype and implications for desmoplakin function in skin and heart. *Br J Dermatol*. 2010;162:1388-1394. doi: 10.1111/j.1365-2133.2010.09668.x.

48. Campuzano O, Alcalde M, Berne P, Zorio E, Iglesias A, Navarro-Manchon J, Brugada J and Brugada R. Role of novel DSP\_p.Q986X genetic variation in arrhythmogenic right ventricular cardiomyopathy. *Eur J Med Genet*. 2013;56:541-545. doi: 10.1016/j.ejmg.2013.08.001.

49. Coats CJ, Quarta G, Flett AS, Pantazis AA, McKenna WJ and Moon JC. Arrhythmogenic left ventricular cardiomyopathy. *Circulation*. 2009;120:2613-2614. doi: 10.1161/circulationaha.109.874628.

50. Reichl K, Kreykes SE, Martin CM and Shenoy C. Desmoplakin Variant-Associated Arrhythmogenic Cardiomyopathy Presenting as Acute Myocarditis. *Circ Genom Precis Med*. 2018;11:e002373. doi: 10.1161/circgen.118.002373.

51. Uzumcu A, Norgett EE, Dindar A, Uyguner O, Nisli K, Kayserili H, Sahin SE, Dupont E, Severs NJ, Leigh IM, et al. Loss of desmoplakin isoform I causes early onset cardiomyopathy and heart failure in a Naxos-like syndrome. *J Med Genet.* 2006;43:e5. doi: 10.1136/jmg.2005.032904.
52. Krishnamurthy S, Adhisivam B, Hamilton RM, Baskin B, Biswal N and Kumar M. Arrhythmogenic dilated cardiomyopathy due to a novel mutation in the desmoplakin gene. *Indian J Pediatr.* 2011;78:866-869. doi: 10.1007/s12098-010-0319-3.
53. Ramoglu MG, Ucar T, Ceylaner S, Atalay S and Tutar E. A novel mutation in the desmoplakin gene in two female siblings with a rare form of dilated cardiomyopathy: Carvajal syndrome. *Anatol J Cardiol.* 2017;18:435-436. doi: 10.14744/AnatolJCardiol.2017.7867.
54. Sakamoto N, Natori S, Hosoguchi S, Minoshima A, Noro T, Akasaka K, Sato N, Ohno S, Ikeda Y, Ishibashi-Ueda H, et al. Left-Dominant Arrhythmogenic Cardiomyopathy With Heterozygous Mutations in DSP and MYBPC3. *Circ Cardiovasc Imaging.* 2019;12:e008913. doi: 10.1161/circimaging.119.008913.
55. Williams T, Machann W, Kuhler L, Hamm H, Muller-Hocker J, Zimmer M, Ertl G, Ritter O, Beer M and Schonberger J. Novel desmoplakin mutation: juvenile biventricular cardiomyopathy with left ventricular non-compaction and acantholytic palmoplantar keratoderma. *Clin Res Cardiol.* 2011;100:1087-1093. doi: 10.1007/s00392-011-0345-9.
56. Protonotarios A, Wicks E, Ashworth M, Stephenson E, Guttmann O, Savvatis K, Sekhri N, Mohiddin SA, Syrris P, Menezes L, et al. Prevalence of (18)F-fluorodeoxyglucose positron emission tomography abnormalities in patients with arrhythmogenic right ventricular cardiomyopathy. *Int J Cardiol.* 2019;284:99-104. doi: 10.1016/j.ijcard.2018.10.083.
57. Navarro-Manchon J, Fernandez E, Igual B, Asimaki A, Syrris P, Osca J, Salvador A and Zorio E. [Left dominant arrhythmogenic cardiomyopathy caused by a novel nonsense mutation in desmoplakin]. *Rev Esp Cardiol.* 2011;64:530-534. doi: 10.1016/j.recesp.2010.10.020.
58. Norgett EE, Hatsell SJ, Carvajal-Huerta L, Cabezas JC, Common J, Purkis PE, Whittock N, Leigh IM, Stevens HP and Kelsell DP. Recessive mutation in desmoplakin disrupts desmoplakin-intermediate filament interactions and causes dilated cardiomyopathy, woolly hair and keratoderma. *Hum Mol Genet.* 2000;9:2761-2766. doi: 10.1093/hmg/9.18.2761.
59. Bauce B, Nava A, Beffagna G, Basso C, Lorenzon A, Smaniotto G, De Bortoli M, Rigato I, Mazzotti E, Steriotis A, et al. Multiple mutations in desmosomal proteins encoding genes in arrhythmogenic right ventricular cardiomyopathy/dysplasia. *Heart Rhythm.* 2010;7:22-29. doi: 10.1016/j.hrthm.2009.09.070.
60. Bari O, Skillman S, Lah MD and Haggstrom AN. Compound heterozygous mutations in desmoplakin associated with skin fragility, follicular hyperkeratosis, alopecia, and nail dystrophy. *Pediatr Dermatol.* 2018;35:e218-e220. doi: 10.1111/pde.13498.
61. Whittock NV, Wan H, Morley SM, Garzon MC, Kristal L, Hyde P, McLean WH, Pulkkinen L, Uitto J, Christiano AM, et al. Compound heterozygosity for non-sense and mis-sense mutations in desmoplakin underlies skin fragility/woolly hair syndrome. *J Invest Dermatol.* 2002;118:232-238. doi: 10.1046/j.0022-202x.2001.01664.x.
62. Asimaki A, Syrris P, Ward D, Guereta LG, Saffitz JE and McKenna WJ. Unique epidermolytic bullous dermatosis with associated lethal cardiomyopathy related to novel desmoplakin mutations. *J Cutan Pathol.* 2009;36:553-559. doi: 10.1111/j.1600-0560.2008.01112.x.
63. Tanaka A, Lai-Cheong JE, Cafe ME, Gontijo B, Salomao PR, Pereira L and McGrath JA. Novel truncating mutations in PKP1 and DSP cause similar skin phenotypes in two Brazilian families. *Br J Dermatol.* 2009;160:692-697. doi: 10.1111/j.1365-2133.2008.08900.x.

64. Tekin B, Yucelten D, Liu L and McGrath JA. Alopecia, palmoplantar keratoderma, skin fragility and follicular hyperkeratoses due to compound heterozygous mutations in desmoplakin. *Australas J Dermatol.* 2017;58:e17-e19. doi: 10.1111/ajd.12385.
65. Antonov NK, Kingsbery MY, Rohena LO, Lee TM, Christiano A, Garzon MC and Lauren CT. Early-onset heart failure, alopecia, and cutaneous abnormalities associated with a novel compound heterozygous mutation in desmoplakin. *Pediatr Dermatol.* 2015;32:102-108. doi: 10.1111/pde.12484.
66. Vahlquist A, Virtanen M, Hellstrom-Pigg M, Dragomir A, Ryberg K, Wilson NJ, Ostman--Smith I, Lu L, McGrath JA and Smith FJ. A Scandinavian case of skin fragility, alopecia and cardiomyopathy caused by DSP mutations. *Clin Exp Dermatol.* 2014;39:30-34. doi: 10.1111/ced.12226.
67. Jonkman MF, Pasmooij AM, Pasmans SG, van den Berg MP, Ter Horst HJ, Timmer A and Pas HH. Loss of desmoplakin tail causes lethal acantholytic epidermolysis bullosa. *Am J Hum Genet.* 2005;77:653-660. doi: 10.1086/496901.
68. Kim SJ, Ko JM, Shin SH, Kim EK, Kim HS and Lee KA. Korean Monozygotic Twins with Lethal Acantholytic Epidermolysis Bullosa Caused by Two Novel DSP Mutations. *Ann Clin Lab Sci.* 2017;47:213-216.
69. Yermakovich D, Sivitskaya L, Vaikhanskaya T, Danilenko N and Motuk I. Novel desmoplakin mutations in familial Carvajal syndrome. *Acta Myol.* 2018;37:263-266.
70. Mahoney MG, Sadowski S, Brennan D, Pikander P, Saukko P, Wahl J, Aho H, Heikinheimo K, Bruckner-Tuderman L, Fertala A, et al. Compound heterozygous desmoplakin mutations result in a phenotype with a combination of myocardial, skin, hair, and enamel abnormalities. *J Invest Dermatol.* 2010;130:968-978. doi: 10.1038/jid.2009.357.
